# Supplementary material for: Self-healing polymers and composites for extreme environments
Source: Royal Society of Chemistry journal article supplement (doi:10.1039/c6ta06213j), 2016-01-01
Supplement: c6ta06213j1.pdf [file c6ta06213j1.pdf]

Electronic Supplementary Information (ESI)

**Self-Healing Polymers and Composites for Extreme Environments**

Yunseon Heo,<sup>a</sup> Mohammad H. Malakooti<sup>b</sup> and Henry A. Sodano<sup>\*b,c,d</sup>

<sup>a</sup> *Department of Materials Science and Engineering, University of Florida, Gainesville, Florida 32611, USA*

<sup>b</sup> *Department of Aerospace Engineering, University of Michigan, Ann Arbor, Michigan, 48109, USA*

<sup>c</sup> *Department of Materials Science and Engineering, University of Michigan, Ann Arbor, Michigan, 48109, USA*

<sup>d</sup> *Department of Macromolecular Science and Engineering, University of Michigan, Ann Arbor, Michigan, 48109, USA*

*\*Correspondence - [hsodano@umich.edu](mailto:hsodano@umich.edu)*

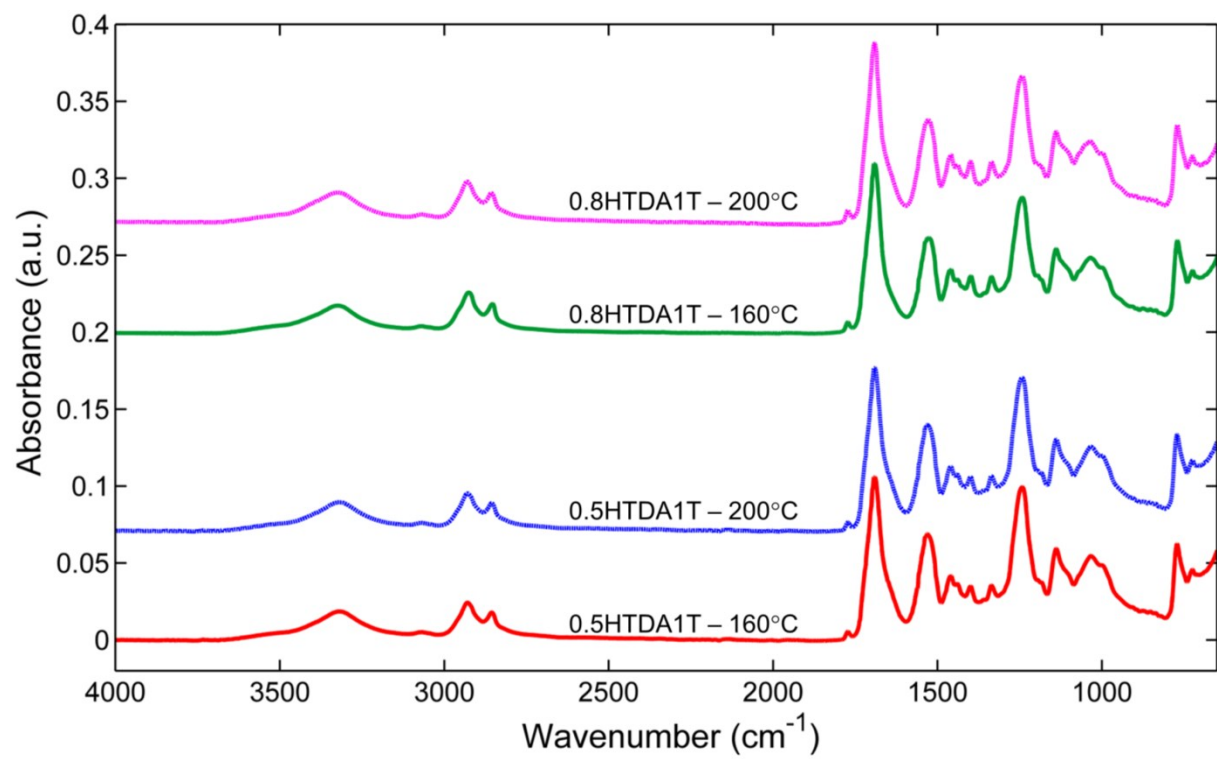

Figure S1: FTIR spectra of self-healing polymers before and after annealing at 200°C for 90 minutes.

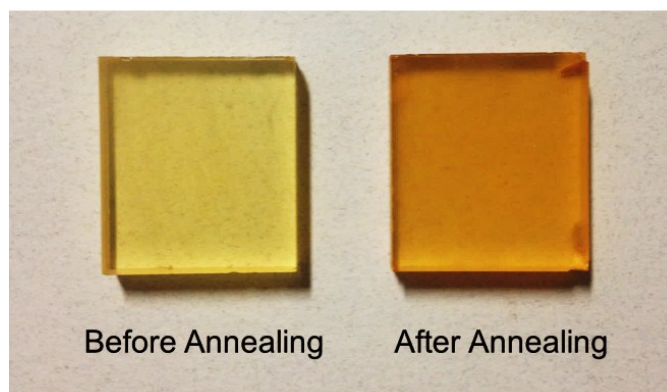

Figure S2. A distinct color change was observed after annealing of the 0.8HTDA1T polymer specimens at 160 °C for 20 hours in the nitrogen.

(a)

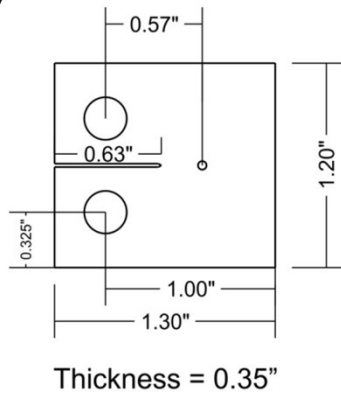

(b)

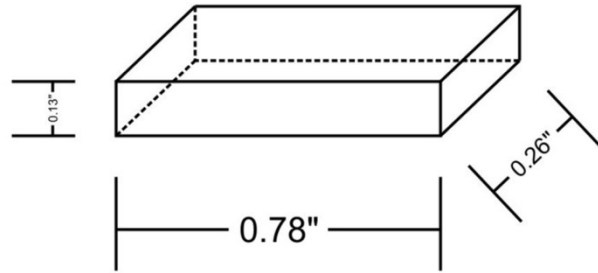

Figure S3: Schematic of the examined specimens with dimensions in inches: (a) compact tension test polymer specimen and (b) unidirectional fiber reinforced polymer specimens for short beam strength (SBS) testing.

(a)

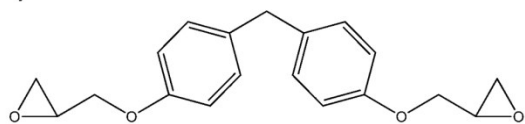

(b)

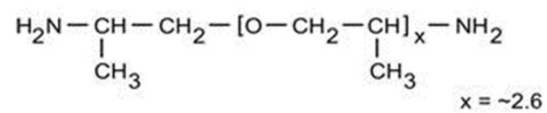

Figure S4: Chemical structures of the epoxy resin and curing agent: (a) EPON™ Resin 862 (Diglycidyl Ether of Bisphenol F) and (b) EPIKURE™ 3230 which is a difunctional primary amine curing agent.
